# Supplementary material
Source: Springer Nature journal article supplement (https://www.springermedizin.de/resource/supplementary/12985_2010_834_MOESM9_ESM.pdf/9609292)
Supplement: MOESM9 [file 9609292]

| groups                  | Mean OD value <sup>a</sup>  |                          |
|-------------------------|-----------------------------|--------------------------|
|                         | LPS                         | Con A                    |
| pcDNA-sM2               | 0.163±0.011 <sup>A</sup>    | 0.226±0.015 <sup>A</sup> |
| GST-sM2                 | 0.283±0.009 <sup>A C*</sup> | 0.272±0.013 <sup>A</sup> |
| pcDNA-C3d-L1-C3d-L2-sM2 | 0.533±0.012 <sup>B**</sup>  | 0.314±0.011 <sup>A</sup> |
| GST-C3d-L1-C3d-L2-sM2   | 0.962±0.023 <sup>D**</sup>  | 0.321±0.011 <sup>A</sup> |
| GST-sM2+IFA             | 0.981±0.023 <sup>E**</sup>  | 0.318±0.011 <sup>A</sup> |
